# Supplementary material for: MicroRNA-200b Regulates the Proliferation and Differentiation of Ovine Preadipocytes by Targeting p27 and KLF9
Source: MDPI journal article supplement (doi:10.3390/ani11082417), 2021-08-17
Supplement: s1 [file s1]

**Table S1.** List of the PCR primers used in this study

| Gene                           | Forward primer<br>sequence (5'-3') | Reverse primer<br>sequence (5'-3') | Reference<br>sequence | Designed purpose                       |
|--------------------------------|------------------------------------|------------------------------------|-----------------------|----------------------------------------|
| <i>aP2</i>                     | GTCCTTCAAATTGGGCCAGG               | ACTCTGGTAGCAGTGACACC               | NM_001114667.1        | RT-qPCR                                |
| <i>PPAR<math>\gamma</math></i> | GAGCCTTCCAATCCCTCAT                | ATGAGACATCCCCACAGCAA               | NM_001100921.1        | RT-qPCR                                |
| <i>C/EBP<math>\beta</math></i> | CATCGACTTCAGCCCCTACC               | CCGCCTTCTTGCAGTTCTTG               | XM_004014883.4        | RT-qPCR                                |
| <i>LPL</i>                     | AGCTGCAGAAAGAACCGTTG               | GAGATCTCGAAGGCCTGGTT               | NM_001009394.1        | RT-qPCR                                |
| <i>FASN</i>                    | ACACAAATTGAGCAGCCCTG               | TGCCGCTCTTGTA CACTGTA              | XM_027974304.1        | RT-qPCR                                |
| <i>GLUT4</i>                   | TGGCTACAACATTGGGGTCA               | ATCATGCCACCCACAGAGAA               | XM_027974995.1        | RT-qPCR                                |
| <i>KLF9</i>                    | CTGAACAAGTACCGACCCAT               | ATAGACTTTCCACAGCCAC                | XM_004004321.4        | RT-qPCR                                |
| <i>CDK2</i>                    | GACCAGCTCTTCCGGATCTT               | ACAAGCTCCGTCCATCTTCA               | NM_001142509.1        | RT-qPCR                                |
| <i>CDK4</i>                    | ACTTTGTGGCCCTCAAGAGT               | CCTGAGGTCTTGTCACAT                 | NM_001127269.1        | RT-qPCR                                |
| <i>CCNB1</i>                   | CCCTCCAGAAATCGGTGACT               | AGCTCAACATCAACCTCTCCA              | XM_027980034.1        | RT-qPCR                                |
| <i>CCND1</i>                   | CATCGAGCACTTCTCTCCA                | CGGGTCACATCTGATCACCT               | XM_027959928.1        | RT-qPCR                                |
| <i>PCNA</i>                    | TCAAGTGGCGTGAACCTACA               | TACTAGTGCCAAGGTGTCCG               | XM_004014340.4        | RT-qPCR                                |
| <i>p53</i>                     | CGGCTTGCAGAAACCTCTTT               | CCCTTTTCTACCTCCTGCCA               | XM_004006850.4        | RT-qPCR                                |
| <i>p27</i>                     | CGGCTTGCAGAAACCTCTTT               | CCCTTTTCTACCTCCTGCCA               | XM_004006850.4        | RT-qPCR                                |
| <i>TBP</i>                     | ACAGCCTCCCACCATATGCCC              | GCTGTGGAGTCAGTCCTGTGC              | XM_027972700.1        | RT-qPCR                                |
| <i>U6</i>                      | TGGAACGCTTCACGAATTTGCG             | GGAACGATACAGAGAAGATTA              | XM_012096728.2        | RT-qPCR                                |
| <i>KLF9</i>                    | CCGCTCGAGAGACAATCTTTATAGTTTCA      | AAATATGCGGCCGCGTACAAAATAC          | XM_004004321.4        | Amplification of 3' UTR of <i>KLF9</i> |
| 3'UTR-wild                     | GG                                 | CTACTGTCAGAA                       |                       |                                        |
| <i>KLF9</i>                    | GTAGTCATAAAGTGACCTAAGTTATTTTGC     | GGTCACTTTATGACTACAAAAATAA          | XM_004004321.4        | Construction of mutant 3' UTR          |
| 3'UTR-Mut                      | TGTCCC                             | AACTGATTAAACAGTTG                  |                       |                                        |
| <i>KLF9</i> CDS                | GGGGTACCATGTCCGCAGCCGCCTAC         | GCTCTAGATCACAAAGGGCTGGCCA<br>G     | XM_004004321.4        | Amplification of CDS sequence          |

|                          |                                     |                                              |                |                                       |
|--------------------------|-------------------------------------|----------------------------------------------|----------------|---------------------------------------|
| <i>p27</i><br>3'UTR-wild | CCGCTCGAGCGCTGACTCCAAGAACGG         | AAATATGCGGCCGCTTGGCTCAGTAT<br>GCAACCTTT      | XM_004006850.4 | Amplification of 3' UTR of <i>p27</i> |
| <i>p27</i><br>3'UTR-Mut  | CCGTCATAACATCAGTCTGGTAATCACTCC<br>A | GACTGATGTTATGACGGTAAATTCCA<br>ATTGTAAGGGAGAC | XM_004006850.4 | Construction of mutant 3' UTR         |
| <i>p27</i> CDS           | GGGGTACCATGTCAAACGTGCGAGTGTCT<br>A  | GCTCTAGATTACGTCTGACGCCTTCT<br>GAGG           | XM_004006850.4 | Amplification of CDS sequence         |

---
