# Supplementary figures and images for: MicroRNA-200b Regulates the Proliferation and Differentiation of Ovine Preadipocytes by Targeting p27 and KLF9
Source: MDPI journal article supplement (doi:10.3390/ani11082417), 2021-08-17

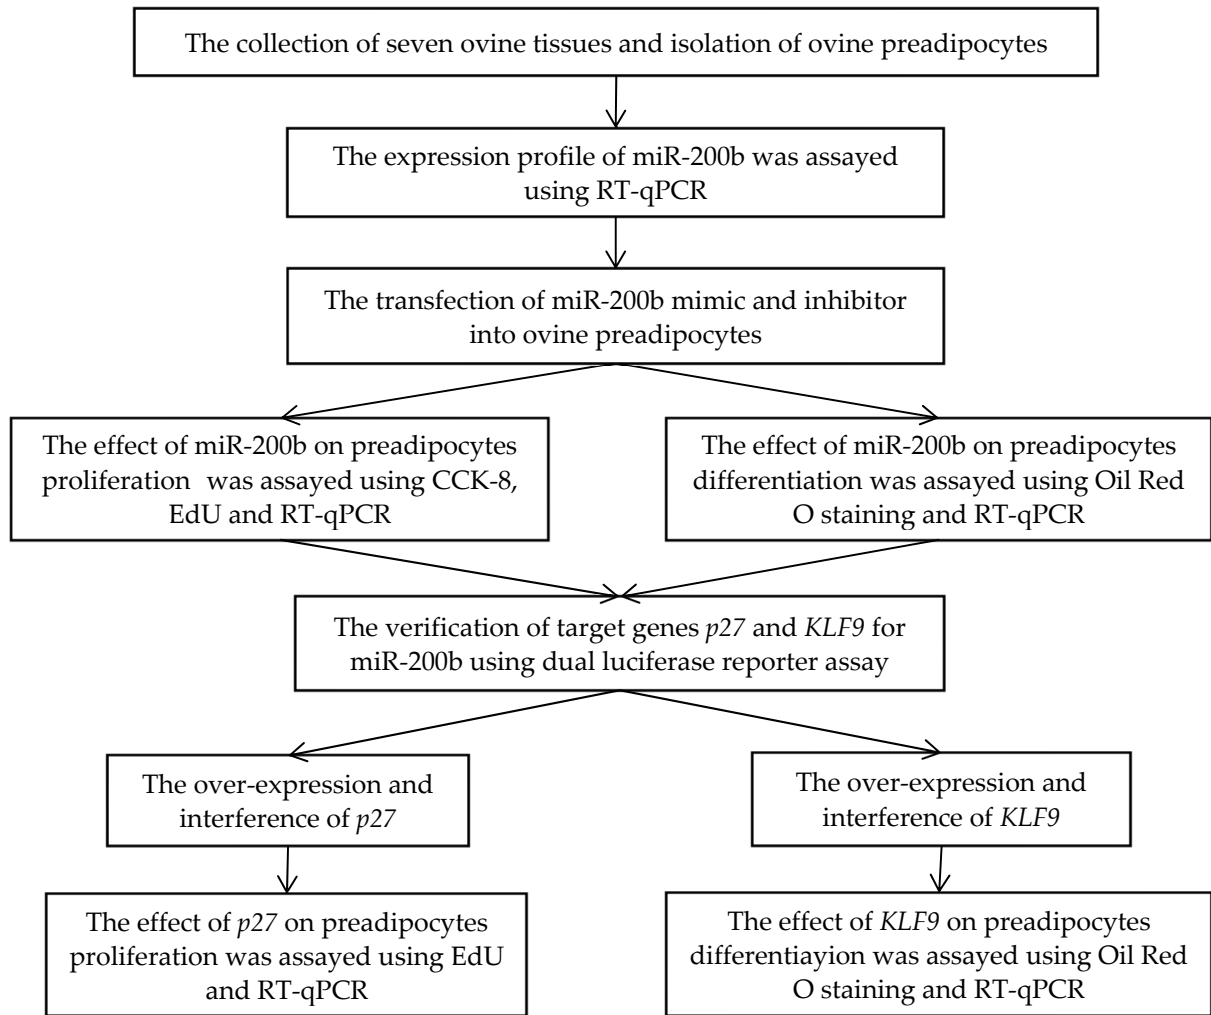

**File S1.** The graphical scheme of whole experiment

Supplement: s1 [file s1]
